# Supplementary material for: When is a metallopolymer not a metallopolymer? When it is a metallomacrocycle
Source: Royal Society of Chemistry journal article supplement (doi:10.1039/c0dt01216e), 2011-01-01
Supplement: c0dt01216e.pdf [file c0dt01216e.pdf]

ESI to accompany

## When is a metallopolymer not a metallopolymer? When it is a metallomacrocycle.

Edwin C. Constable,\* Kate Harris, Catherine E. Housecroft\* and Markus Neuburger

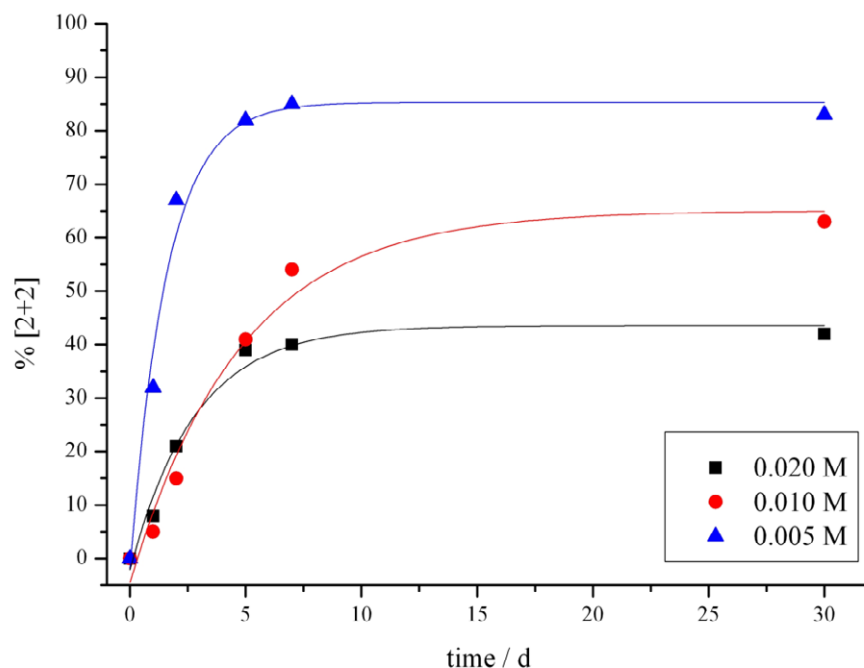

Fig. S1 Graph showing the relative proportions (determined by 250 MHz  $^1\text{H}$  NMR spectroscopy of  $\text{CD}_3\text{CN}$  solutions) of the proposed  $[\text{Co}_2(\mathbf{3})_2][\text{PF}_6]_4$  species present in mixtures formed in the reaction of  $\mathbf{3}$  with  $\text{Co}(\text{OAc})_2 \cdot 4\text{H}_2\text{O}$  in  $\text{CHCl}_3/\text{MeOH}$  (9:1) followed by precipitation with  $\text{NH}_4\text{PF}_6$ .

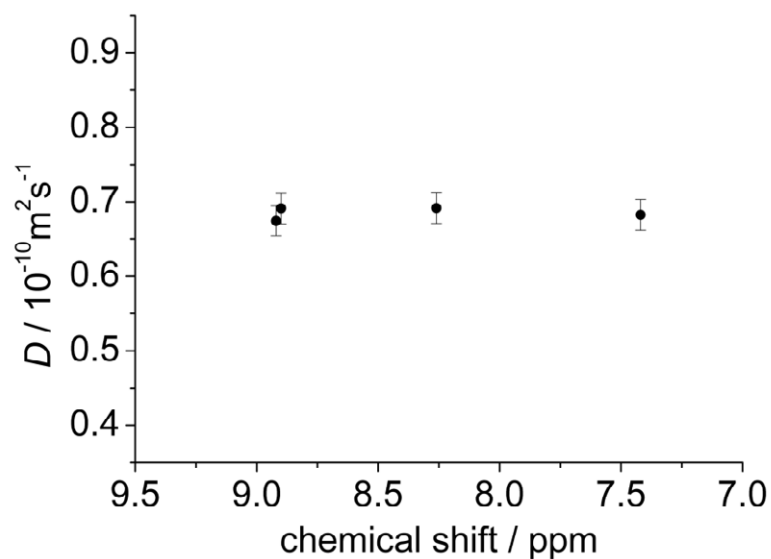

Fig. S2  $^1\text{H}$  DOSY-type plot (500 MHz,  $\text{DMSO-}d_6$ , 295 K) of an oxidized equilibrium mixture of  $[\text{Co}_n(\mathbf{2})_n][\text{PF}_6]_3$  ( $\Delta = 48.8$  ms,  $\delta = 11.0$  ms).

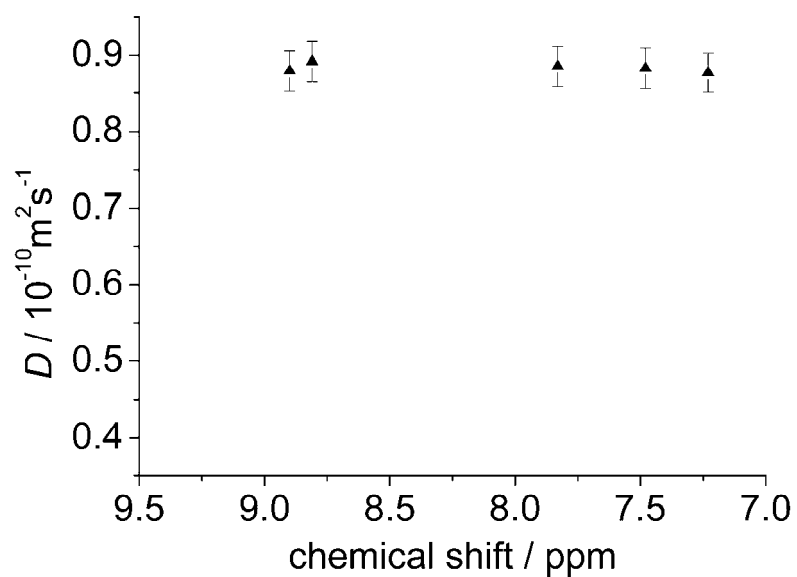

Fig. S3  $^1\text{H}$  DOSY-type plot (500 MHz,  $\text{DMSO-}d_6$ , 295 K) of an oxidized equilibrium mixture of  $[\text{Co}_n(\mathbf{3})_n][\text{PF}_6]_3$  ( $\Delta = 48.8$  ms,  $\delta = 9.0$  ms).

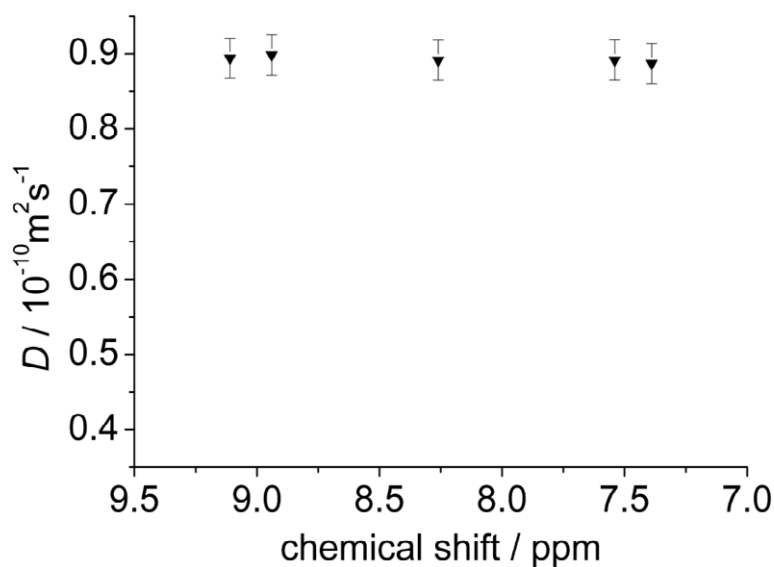

Fig. S4 <sup>1</sup>H DOSY-type plot (500 MHz, DMSO-*d*<sub>6</sub>, 295 K) of an oxidized equilibrium mixture of [Co<sub>*n*</sub>(**4**)<sub>*n*</sub>][PF<sub>6</sub>]<sub>3</sub> ( $\Delta = 52.8$  ms,  $\delta = 9.0$  ms).

Table S1 Calculated radii for models of the metallomacrocyclic complexes.<sup>a</sup>

| Complex                                                    | <i>r</i> / Å<br>sphere | 2 $\alpha$ / Å | 2 $\beta$ / Å | <i>r</i> <sub>e</sub> <sup>d</sup> / Å<br>ellipsoid |
|------------------------------------------------------------|------------------------|----------------|---------------|-----------------------------------------------------|
| [Co <sub>3</sub> ( <b>2</b> ) <sub>3</sub> ] <sup>9+</sup> | 12.45                  | 24.90          | 8.63          | 8.74 <sup>b</sup>                                   |
| [Co <sub>2</sub> ( <b>3</b> ) <sub>2</sub> ] <sup>6+</sup> | 10.91                  | 21.77          | 19.10         | 9.97 <sup>c</sup>                                   |
| [Co <sub>2</sub> ( <b>4</b> ) <sub>2</sub> ] <sup>6+</sup> | 13.06                  | 26.12          | 19.29         | 10.64 <sup>c</sup>                                  |

<sup>a</sup>The length, 2 $\alpha$ , of the major axis of both ellipsoids was taken as the longest distance across the metallomacrocyclic in the crystal structure. The minor axis (length 2 $\beta$ ) of the prolate ellipsoid was measured as the longest distance perpendicular to the major axis, and of the oblate ellipsoid was the longest distance between the H<sup>A4</sup> protons of two tpy units coordinated to the same Co<sup>3+</sup> ion, perpendicular to the major axis.

<sup>b</sup>Oblate ellipsoid model

<sup>c</sup>Prolate ellipsoid model

<sup>d</sup>*r*<sub>e</sub> is calculated from 2 $\alpha$  and 2 $\beta$  according to: K. E. v. Holde, W. C. Johnson and P. S. Ho, *Principles of Physical Biochemistry*, 2nd edn., Pearson Prentice Hall, Upper Saddle River, 2006.

Table S2 Correction factors<sup>a</sup> to the Stokes-Einstein equation for non-spherical model metallomacrocycles of molecular size  $f/f_0$ , for the shape of the molecule and  $c$ , taking into account the size of the molecule.

The relationship<sup>b</sup> used for the diffusion coefficient was:

$$D = \frac{kT}{6\pi\eta rc(f/f_0)} \text{ where } c = \left[ 1 + 0.695 \left( \frac{r_{\text{solvent}}}{r} \right)^{2.234} \right]^{-1}$$

| Complex                            | $f/f_0$ , ellipsoid <sup>c</sup> | $c_{\text{ellipsoid}}$ | $c_{\text{spherical}}$ |
|------------------------------------|----------------------------------|------------------------|------------------------|
| $[\text{Co}_3(\mathbf{2})_3]^{9+}$ | 1.11 <sup>d</sup>                | 0.959 <sup>c</sup>     | 0.981                  |
| $[\text{Co}_2(\mathbf{3})_2]^{6+}$ | 1.00 <sup>e</sup>                | 0.969 <sup>c</sup>     | 0.975                  |
| $[\text{Co}_2(\mathbf{4})_2]^{6+}$ | 1.01 <sup>e</sup>                | 0.973 <sup>d</sup>     | 0.983                  |

<sup>a</sup> A. Macchioni, G. Ciancaleoni, C. Zuccaccia and D. Zuccaccia, *Chem. Soc. Rev.*, 2008, **37**, 479.

<sup>b</sup> E. Yumet, H. C. Chen and S. H. Chen, *AIChE J.*, 1985, **31**, 76; H. C. Chen and S. H. Chen, *J. Phys. Chem.*, 1984, **88**, 5118.

<sup>c</sup> K. E. v. Holde, W. C. Johnson and P. S. Ho, *Principles of Physical Biochemistry*, 2nd edn., Pearson Prentice Hall, Upper Saddle River, 2006.

<sup>d</sup> Oblate ellipsoid model

<sup>e</sup> Prolate ellipsoid model
